# Supplementary material for: Healthy-like CD4+ Regulatory and CD4+ Conventional T-Cell Receptor Repertoires Predict Protection from GVHD Following Donor Lymphocyte Infusion
Source: MDPI journal article supplement (doi:10.3390/ijms231810914), 2022-09-18
Supplement: s1 [file s1]

## **Supplementary Materials**

**Supplementary Figure S1.** GVHD post DLI is associated with reduced CIR and increased NRM.

**Supplementary Figure S2.** Clonal space and repertoire proportions GVHD vs. HC.

**Supplementary Figure S3.** Diversity in steroid samples over time.

**Supplementary Figure S4.** Future GVHD post DLI is not reflected in  $CD4^+CD25^+CD127^{low}$   $T_{reg}$  and  $CD4^+ T_{con}$  repertoire prior to DLI.

**Supplementary Figure S5.** Future GVHD post DLI is not reflected in  $CD4^+CD25^+CD127^{low}$   $T_{reg}$  and  $CD4^+ T_{con}$  repertoire of the DLI cell product.

**Supplementary Figure S6.** Gating strategy for cell sorting.

**Supplementary Table S1.** Disease and transplant characteristics.

**Supplementary Table S2.** DLI characteristics.

**Supplementary Table S3.** Healthy controls' characteristics.

**Supplementary Table S4.** Details about GVHD post DLI.

**Supplementary Table S5.** Correlation analyses between absolute cell counts and 1/D.

**Supplementary Table S6.** Clinical characteristics of expanded and not expanded samples at first time point post DLI.

**Supplementary Table S7.** Patient samples.

**Supplementary Table S8.** Healthy control samples.

**Supplementary Table S9.** Antibody panel for flow cytometry.

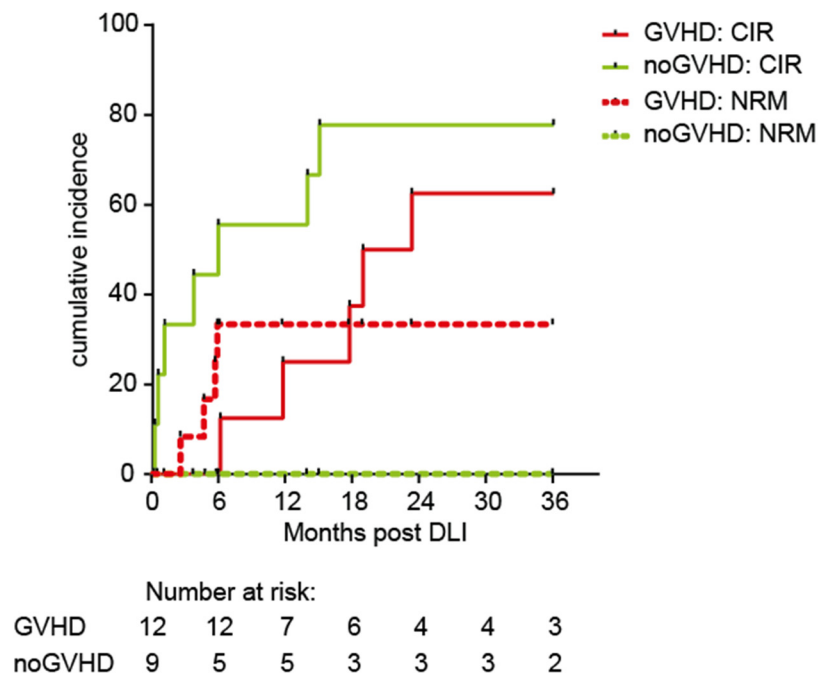

**Supplementary Figure S1. GVHD post DLI is associated with reduced CIR and increased NRM.** Cumulative incidence curves are displayed with relapse incidence (CIR, solid lines) and non-relapse mortality (NRM, dotted lines) as competing events for patients with GVHD (red) vs. patients without GVHD (green) within the 36 months study follow-up (CIR,  $P=0.024$ ; NRM,  $P=0.067$ ). CIR and NRM were assessed by means of cumulative incidence curves by Gray's test.

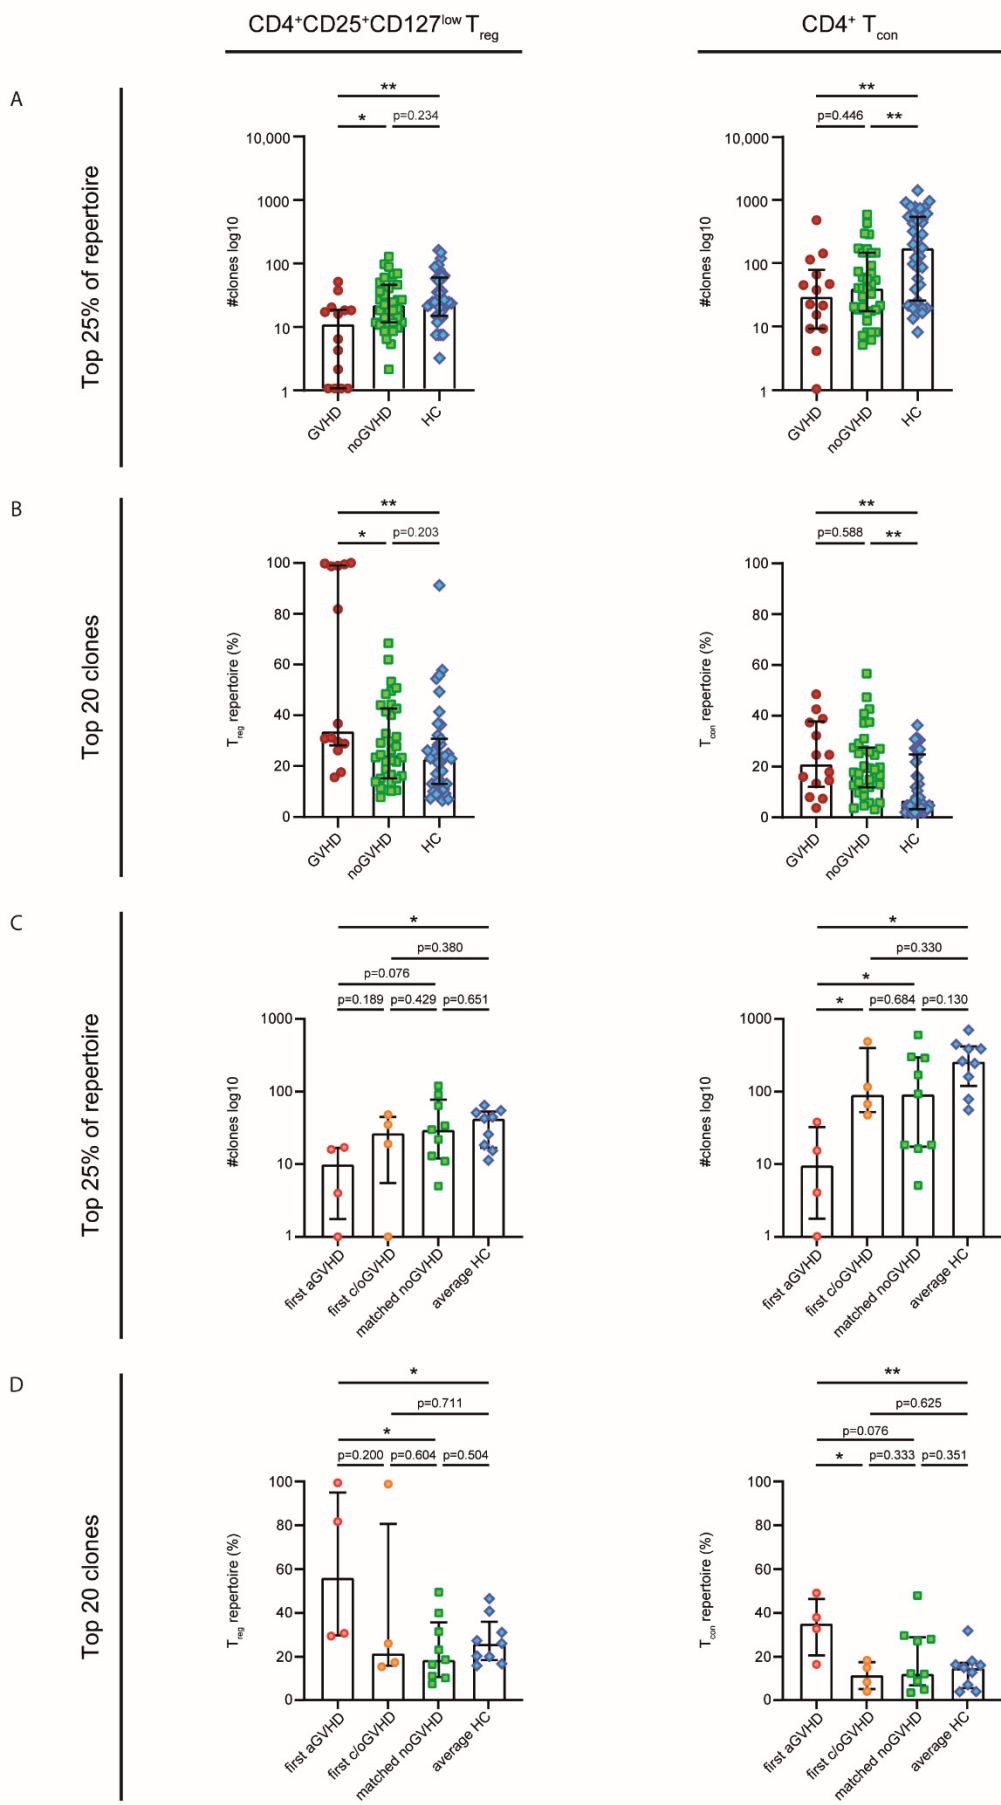

**Supplementary Figure S2. Clonal space and repertoire proportions GVHD vs. HC. (A, B)**

Comparison of both  $CD4^+CD25^+CD127^{low}$   $T_{reg}$  and  $CD4^+$   $T_{con}$  repertoire clonality in all patients' samples with GVHD post DLI (dark red circles, n=14) or without GVHD (noGVHD, green square, n=35) compared to healthy controls (HC, blue rhomb, n=39). **(A)** Number of unique clonotypes (y axis) required to occupy 25% of the  $CD4^+CD25^+CD127^{low}$   $T_{reg}$  (left panel) and the  $CD4^+$   $T_{con}$  repertoire (right panel). **(B)** Clonal proportions of the  $CD4^+CD25^+CD127^{low}$   $T_{reg}$  (left panel) and  $CD4^+$   $T_{con}$  repertoire (right panel) for the top 20 clones. **(C, D)** Comparison of samples with first occurrence of acute (a)GVHD (light red circle, n=4) and chronic or overlapping (c/o)GVHD (orange circle, n=4), samples without GVHD (matched for timing, n=9) and average clonality in HC (n=9). **(C)** Number of unique clonotypes (y axis) required to occupy 25% of the  $CD4^+CD25^+CD127^{low}$   $T_{reg}$  (left panel) and the  $CD4^+$   $T_{con}$  repertoire (right panel). **(D)** Clonal proportions of the  $CD4^+CD25^+CD127^{low}$   $T_{reg}$  (left panel) and  $CD4^+$   $T_{con}$  repertoire (right panel) for the top 20 clones. Two-tailed Mann-Whitney test or unpaired Student t-test was used for inter-group comparisons. Black lines indicate median, error bars show the interquartile range. \*\*  $p<0.01$ ; \*  $p<0.05$ .

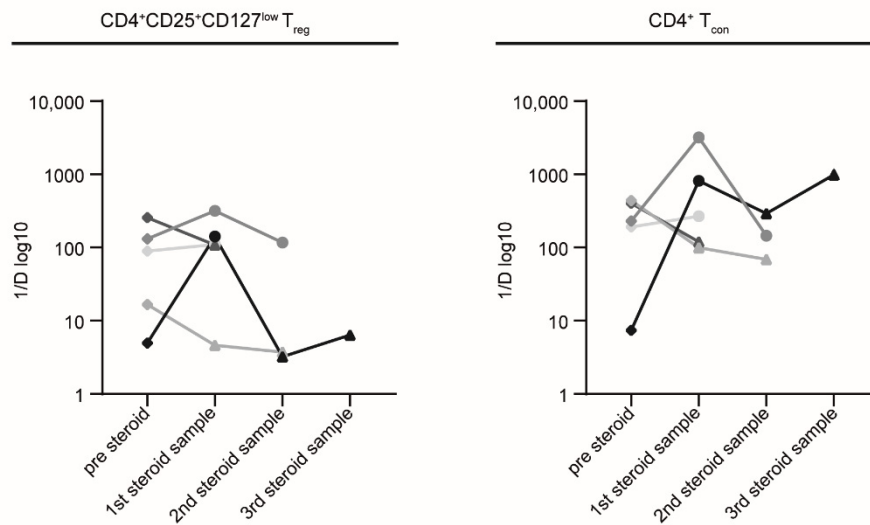

**Supplementary Figure S3. Diversity in steroid samples over time.** The graphs show both CD4<sup>+</sup>CD25<sup>+</sup>CD127<sup>low</sup> T<sub>reg</sub> (left panel) and CD4<sup>+</sup> T<sub>con</sub> repertoire (right panel) diversity in patients receiving treatment with systemic steroids (>7.5mg, n=5) over time. Only patients with available pre-steroid samples were included. Each line illustrates the repertoire dynamics of an individual patient, with matching gray shades in the left and right panel. Rhombs display samples prior to steroid treatment. Circles represent steroid sensitive samples (n=4), triangles represent steroid refractory samples (n=5).

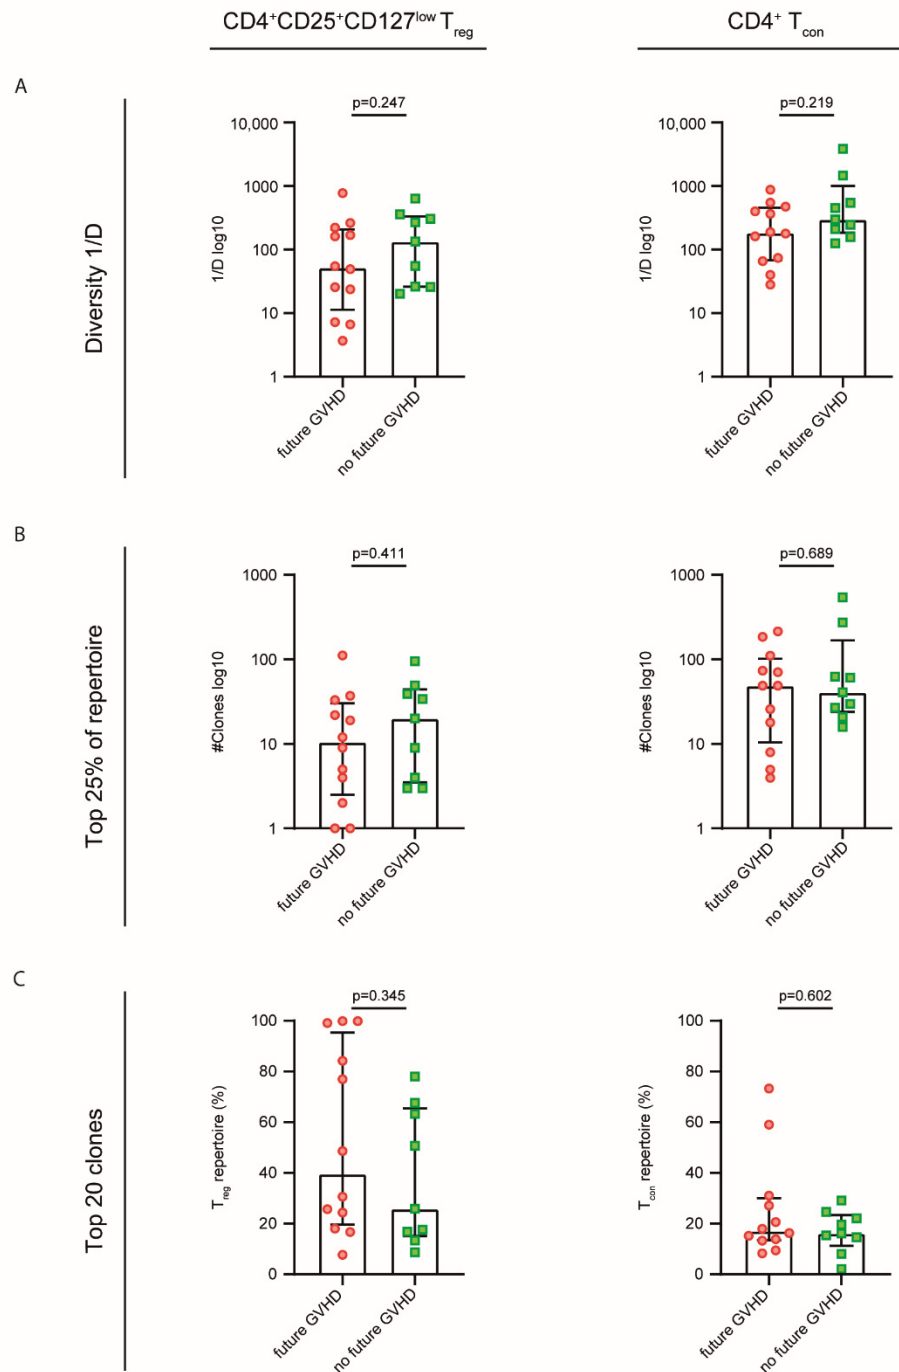

**Supplementary Figure S4. Future GVHD post DLI is not reflected in CD4<sup>+</sup>CD25<sup>+</sup>CD127<sup>low</sup> T<sub>reg</sub> and CD4<sup>+</sup> T<sub>con</sub> repertoire prior to DLI. (A, B, C) The CD4<sup>+</sup>CD25<sup>+</sup>CD127<sup>low</sup> T<sub>reg</sub> (left panel) and CD4<sup>+</sup> T<sub>con</sub> repertoire (right panel) is compared between patient samples prior to DLI with future development of GVHD (red circle, n=12) during the 36 months study follow-up and patient samples prior to DLI without future**

development of GVHD (green square, n=9). **(A)** shows the diversity of CD4<sup>+</sup>CD25<sup>+</sup>CD127<sup>low</sup> T<sub>reg</sub> and CD4<sup>+</sup> T<sub>con</sub> repertoire. **(B)** Comparison of the number of unique clonotypes (y axis) required to occupy the top 25% of the CD4<sup>+</sup>CD25<sup>+</sup>CD127<sup>low</sup> T<sub>reg</sub> and CD4<sup>+</sup> T<sub>con</sub> repertoire. **(C)** The graphs display the CD4<sup>+</sup>CD25<sup>+</sup>CD127<sup>low</sup> T<sub>reg</sub> and CD4<sup>+</sup> T<sub>con</sub> repertoire occupied by the top 20 clones. Two-tailed Mann-Whitney test or unpaired Student t-test was used for inter-group comparisons. Black lines indicate median, error bars show the interquartile range. \*\* p<0.01; \* p<0.05.

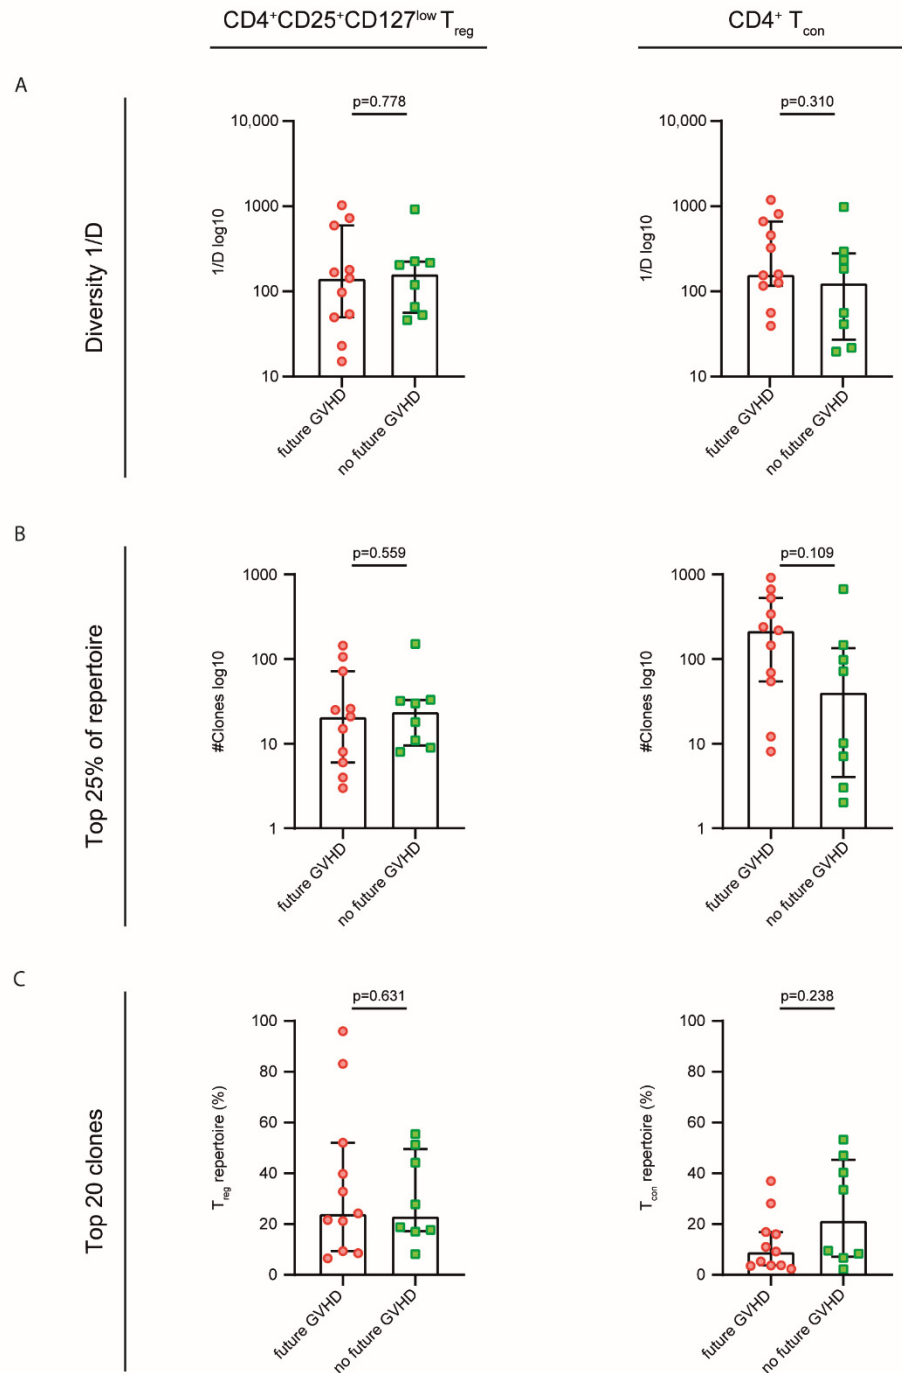

**Supplementary Figure S5. Future GVHD post DLI is not reflected in CD4<sup>+</sup>CD25<sup>+</sup>CD127<sup>low</sup> T<sub>reg</sub> and CD4<sup>+</sup> T<sub>con</sub> repertoire of the DLI cell product. (A, B, C) The CD4<sup>+</sup>CD25<sup>+</sup>CD127<sup>low</sup> T<sub>reg</sub> (left panel) and CD4<sup>+</sup> T<sub>con</sub> repertoire (right panel) is compared between DLI product samples of patients with future development of GVHD (red circle, n=11) during the 36 months study follow-up and DLI product samples of patients without future development of GVHD (green square, n=8). Patient 018 and 027 were excluded from this**



analysis since there were only donor's peripheral blood samples available. **(A)** Comparison of the diversity  $1/D$  of  $CD4^+CD25^+CD127^{low}$   $T_{reg}$  and  $CD4^+$   $T_{con}$  repertoire. **(B)** Comparison of the number of unique clonotypes (y axis) required to occupy the top 25% of the  $CD4^+CD25^+CD127^{low}$   $T_{reg}$  and  $CD4^+$   $T_{con}$  repertoire. **(C)** The graphs display the  $CD4^+CD25^+CD127^{low}$   $T_{reg}$  and  $CD4^+$   $T_{con}$  repertoire occupied by the top 20 clones. Two-tailed Mann-Whitney test or unpaired Student t-test was used for inter-group comparisons. Black lines indicate median, error bars show the interquartile range. \*\*  $p<0.01$ ; \*  $p<0.05$ .

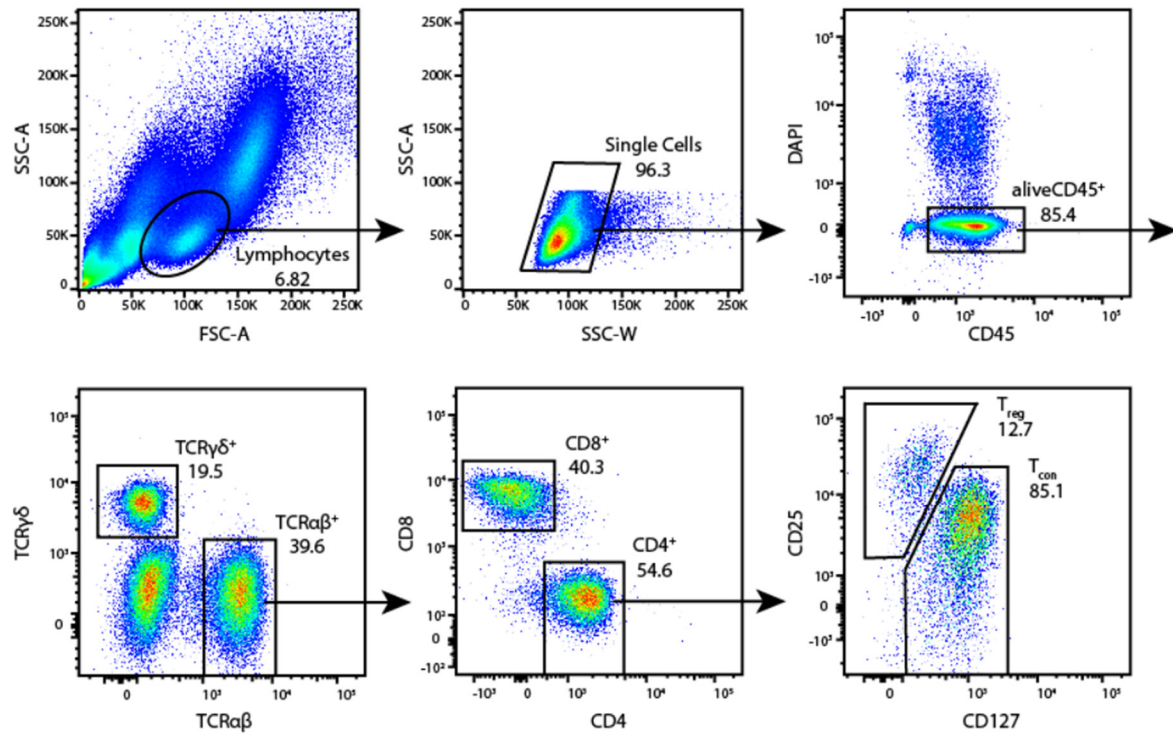

**Supplementary Figure S6. Gating strategy for cell sorting.**

# Supplementary Table S1. Disease and transplant characteristics.

Abbreviations: AA, aplastic anemia; alloHSCT, allogeneic hematopoietic stem cell transplantation; AML, acute myeloid leukemia; BM, bone marrow; c-ALL, common acute lymphatic leukemia; DLI, donor lymphocyte infusion; ELN, European Leukemia Net; ET, essential thrombocythemia; f, female; IPSS-R, revised international prognostic scoring system; m, male; MDS, myelodysplastic syndrome; MPN, myeloproliferative neoplasm; PBSC, peripheral blood stem cells; PMF, primary myelofibrosis; PV, polycythemia vera; sAML, secondary acute myeloid leukemia; SMF, secondary myelofibrosis; tAML, therapy-associated acute myeloid leukemia. \*Disease risk according to ELN [26] and IPSS-R [27].

| Patient ID | Patient sex | Age at first DLI (years) | Disease details | Disease risk according to ELN and IPSS-R* | Donor sex | Donor age at alloHSCT (years) | Graft source |
|------------|-------------|--------------------------|-----------------|-------------------------------------------|-----------|-------------------------------|--------------|
| 01         | f           | 36                       | AML             | intermediate                              | f         | 43                            | PBSC         |
| 02         | m           | 63                       | MDS             | high                                      | m         | 22                            | PBSC         |
| 03         | f           | 23                       | c-ALL           | standard                                  | m         | 29                            | PBSC         |
| 07         | f           | 55                       | PMF/MDS-MPN     | intermediate                              | m         | 57                            | PBSC         |
| 08         | f           | 57                       | MDS             | intermediate                              | m         | 58                            | PBSC         |
| 09         | m           | 72                       | sAML from MDS   | intermediate                              | m         | 22                            | PBSC         |
| 10         | f           | 39                       | tAML            | adverse                                   | m         | 30                            | PBSC         |
| 11         | m           | 45                       | AML             | intermediate                              | f         | 45                            | PBSC+BM      |
| 12         | f           | 50                       | AML             | intermediate                              | f         | 26                            | PBSC         |
| 13         | f           | 64                       | sAML from MDS   | intermediate                              | f         | 64                            | PBSC         |
| 16         | f           | 36                       | sAML from MPN   | intermediate                              | m         | 31                            | PBSC         |
| 17         | f           | 48                       | ET/SMF          | -                                         | m         | 31                            | PBSC         |
| 18         | m           | 36                       | AML             | adverse                                   | f         | 27                            | BM           |
| 19         | f           | 51                       | AML             | intermediate                              | f         | 45                            | PBSC         |
| 20         | m           | 55                       | PV              | -                                         | m         | 26                            | PBSC         |
| 22         | m           | 50                       | AML             | favorable                                 | m         | 51                            | PBSC         |
| 23         | m           | 65                       | AML             | adverse                                   | m         | 61                            | PBSC         |
| 25         | m           | 41                       | AML             | intermediate                              | m         | 29                            | PBSC         |
| 27         | f           | 39                       | sAML from AA    | intermediate                              | f         | 35                            | BM           |
| 30         | m           | 40                       | tAML            | adverse                                   | m         | 27                            | PBSC         |
| 33         | f           | 33                       | AML             | adverse                                   | f         | 30                            | PBSC         |

## Supplementary Table S2. DLI characteristics.

Abbreviations: alloHSCT, allogeneic hematopoietic stem cell transplantation; BW, body weight; CR, complete remission; CR<sub>i</sub>, CR with incomplete hematologic recovery; CTx, chemotherapy; DAC, Daunorubicin + Cytarabine + Cladribine; DLI, donor lymphocyte infusion; EM, extramedullary; FLA-IDA, Fludarabine + Cytarabine + Idarubicin; Gy, Gray; hr, high risk; iHC, increased host chimerism; PD, progressive disease; R, Relapse; RD, resistant disease; RTx, Radiatio (dose in Gy); SAIL, Selinexor + Cytarabine + Idarubicin; V-I-PEG-A-Dexa, Vindesine + Idarubicin + PEG-Asparaginase + Dexamethasone. \*according to ELN response criteria [26].

| Patient ID | DLI Trigger        | CTx pre DLI            | Months post CTx at first DLI | Response to CTx*      | Months post alloHSCT at first DLI | Dose first DLI (CD3 <sup>+</sup> / kg BW) | Total number of DLI | Cumulative dose DLI (CD3 <sup>+</sup> /kg BW) |
|------------|--------------------|------------------------|------------------------------|-----------------------|-----------------------------------|-------------------------------------------|---------------------|-----------------------------------------------|
| 01         | Cytologic R        | SAIL                   | 1.4                          | CR <sub>i</sub> , iHC | 7.9                               | 1x10 <sup>7</sup>                         | 1                   | 1 x10 <sup>7</sup>                            |
| 02         | Cytologic R        | FLA-IDA                | 1.4                          | PR                    | 23.8                              | 1.2x10 <sup>7</sup>                       | 1                   | 1.2 x10 <sup>7</sup>                          |
| 03         | Cytologic R        | V-I-PEG-A-Dexa         | 1.6                          | RD                    | 8.8                               | 1x10 <sup>7</sup>                         | 1                   | 1 x10 <sup>7</sup>                            |
| 07         | iHC                | -                      | -                            | -                     | 10.3                              | 0.1x10 <sup>7</sup>                       | 3                   | 0.7 x10 <sup>7</sup>                          |
| 08         | iHC                | -                      | -                            | -                     | 10.5                              | 0.1x10 <sup>7</sup>                       | 2                   | 0.6 x10 <sup>7</sup>                          |
| 09         | Cytologic R        | Decitabine             | 0.2                          | PR                    | 29.4                              | 1x10 <sup>7</sup>                         | 1                   | 1 x10 <sup>7</sup>                            |
| 10         | Cytologic R        | Azacitidine, Sorafenib | 0.3                          | PR                    | 5.6                               | 0.5x10 <sup>7</sup>                       | 1                   | 0.5 x10 <sup>7</sup>                          |
| 11         | hr Genotype        | -                      | -                            | -                     | 9.2                               | 0.1x10 <sup>7</sup>                       | 4                   | 6.6 x10 <sup>7</sup>                          |
| 12         | Histologic R       | -                      | -                            | -                     | 17.1                              | 1x10 <sup>7</sup>                         | 3                   | 16 x10 <sup>7</sup>                           |
| 13         | iHC                | -                      | -                            | -                     | 8.1                               | 0.1x10 <sup>7</sup>                       | 4                   | 5.6 x10 <sup>7</sup>                          |
| 16         | Histologic R       | SAIL                   | 1.9                          | CR <sub>i</sub> , iHC | 22.0                              | 0.5x10 <sup>7</sup>                       | 7                   | 32.5 x10 <sup>7</sup>                         |
| 17         | Histologic R       | -                      | -                            | -                     | 24.0                              | 0.1x10 <sup>7</sup>                       | 3                   | 1.1 x10 <sup>7</sup>                          |
| 18         | Molecular R        | -                      | -                            | -                     | 9.6                               | 0.5x10 <sup>7</sup>                       | 1                   | 0.5 x10 <sup>7</sup>                          |
| 19         | hRG                | -                      | -                            | -                     | 8.3                               | 0.1x10 <sup>7</sup>                       | 2                   | 0.6 x10 <sup>7</sup>                          |
| 20         | Molecular R        | -                      | -                            | -                     | 9.3                               | 0.1x10 <sup>7</sup>                       | 4                   | 3.4 x10 <sup>7</sup>                          |
| 22         | Cytologic R        | FLA-IDA                | 1.2                          | PR                    | 14.2                              | 1x10 <sup>7</sup>                         | 2                   | 6 x10 <sup>7</sup>                            |
| 23         | Cytologic R        | Azacitidine            | 0.3                          | PR                    | 4.6                               | 0.5x10 <sup>7</sup>                       | 1                   | 0.5 x10 <sup>7</sup>                          |
| 25         | Cytologic R        | SAIL                   | 0.9                          | CR, iHC               | 75.7                              | 1x10 <sup>7</sup>                         | 1                   | 1 x10 <sup>7</sup>                            |
| 27         | iHC                | -                      | -                            | -                     | 11.0                              | 2.5x10 <sup>7</sup>                       | 3                   | 11.5 x10 <sup>7</sup>                         |
| 30         | Molecular R        | FLA-IDA                | 1.4                          | CR, iHC               | 26.3                              | 1x10 <sup>7</sup>                         | 2                   | 6 x10 <sup>7</sup>                            |
| 33         | Cytologic R + EM R | DAC                    | 1.1                          | CR, iHC               | 11.5                              | 1x10 <sup>7</sup>                         | 1                   | 1 x10 <sup>7</sup>                            |

**Supplementary Table S3. Healthy controls' characteristics.**

Abbreviations: ALC, absolute lymphocyte count; f, female; Hb, hemoglobin; HC, healthy controls; m, male; PLT, platelets; WBC, white blood cell count.

| HC ID  | Age (years) | Sex | CMV IgM/IgG | EBV IgM/IgG | WBC, average (/μl) | ALC, average (/μl) | Hb, average (g/dl) | PLT, average (/μl) |
|--------|-------------|-----|-------------|-------------|--------------------|--------------------|--------------------|--------------------|
| H16.02 | 46          | m   | -/+         | -/+         | 4920               | 1770               | 13.9               | 332,000            |
| H16.03 | 58          | m   | +/+         | +/+         | 6600               | 1860               | 15.1               | 257,330            |
| H16.04 | 66          | m   | -/+         | -/+         | 8320               | 1940               | 16.1               | 235,670            |
| H16.06 | 28          | m   | -/+         | -/+         | 7950               | 3810               | 13.9               | 287,000            |
| H16.07 | 21          | m   | -/-         | -/-         | 7780               | 2410               | 14.2               | 347,670            |
| H16.11 | 33          | f   | -/-         | -/+         | 7890               | 1800               | 13.3               | 343,330            |
| H16.12 | 43          | f   | -/-         | -/-         | 4170               | 1650               | 15.2               | 179,330            |
| H16.13 | 53          | f   | -/-         | -/+         | 8230               | 1350               | 14.6               | 215,670            |
| H16.14 | 31          | f   | -/+         | -/+         | 6690               | 2540               | 12.1               | 246,670            |

# Supplementary Table S4. Details about GVHD post DLI.

Abbreviations: aGVHD, acute graft-versus-host disease; alloHSCT, allogeneic hematopoietic stem cell transplantation; c/oGVHD, chronic/overlap graft-versus-host disease; DLI, donor lymphocyte infusion; GI, gastrointestinal tract; MMF, mycophenolate mofetil; IS, immunosuppression. \*according to MAGIC criteria [34]; \*\*according to NIH 2014 criteria [35]; \*\*\*according to EBMT-NIH-CIBMTR task force panel recommendation [31].

| Patient ID | First GVHD, months post DLI | aGVHD post DLI: grade*; organ involvement | c/oGVHD post DLI: grade**; organ involvement  | Treatment with systemic steroids >7.5mg | Response to steroids*** | Additional IS              | Relapse post DLI, months |
|------------|-----------------------------|-------------------------------------------|-----------------------------------------------|-----------------------------------------|-------------------------|----------------------------|--------------------------|
| 01         | 0.6                         | III; skin, GI, liver                      | -                                             | yes                                     | sensitive               | -                          | -                        |
| 02         | 1.1                         | III; skin, GI, liver                      | -                                             | yes                                     | sensitive               | -                          | -                        |
| 08         | 15.4                        | -                                         | mild; eyes, mucosa                            | no                                      | -                       | -                          | -                        |
| 10         | 1.3                         | IV; skin, GI, liver                       | severe; GI, liver, eyes, mucosa               | yes                                     | refractory              | MMF, infliximab, sirolimus | 17.7                     |
| 11         | 3.2                         | II; liver                                 | moderate; skin, liver, eyes, mucosa           | yes                                     | sensitive               | -                          | 11.3                     |
| 12         | 5.1                         | II; skin, GI                              | severe; skin, GI, liver, mucosa, eyes, joints | yes                                     | sensitive + refractory  | -                          | 19.3                     |
| 16         | 3.1                         | I; skin                                   | -                                             | no                                      | -                       | -                          | 6.1                      |
| 17         | 3.2                         | IV; skin, liver                           | severe; skin, liver, eyes, mucosa             | yes                                     | refractory              | MMF                        | -                        |
| 20         | 7.8                         | I; skin                                   | moderate; skin, eyes, mucosa                  | yes                                     | sensitive               | -                          | -                        |
| 22         | 2.3                         | IV; skin, liver                           | severe; skin, liver, eyes, mucosa             | yes                                     | refractory              | MMF                        | -                        |
| 27         | 14.4                        | III; skin, GI                             | -                                             | no                                      | -                       | -                          | 11.7                     |
| 30         | 1.2                         | I; skin                                   | severe; skin, liver, lung, eyes, mucosa       | yes                                     | sensitive + refractory  | MMF                        | -                        |

**Table S5. Correlational analyses between absolute cell counts and 1/D.**

Correlation between absolute cell counts and diversity in GVHD and no GVHD patients as well as healthy controls was tested by Pearson correlation coefficient. Abbreviations: GVHD, graft-versus-host disease; HC, healthy controls; r, correlation coefficient

|                                                                          | Population | Pearson r | P value |
|--------------------------------------------------------------------------|------------|-----------|---------|
| CD4 <sup>+</sup> CD25 <sup>+</sup> CD127 <sup>low</sup> T <sub>reg</sub> | GVHD       | 0.054     | 0.860   |
|                                                                          | noGVHD     | 0.103     | 0.556   |
|                                                                          | HC         | -0.023    | 0.892   |
| CD4 <sup>+</sup> T <sub>con</sub>                                        | GVHD       | -0.295    | 0.328   |
|                                                                          | noGVHD     | 0.122     | 0.486   |
|                                                                          | HC         | 0.285     | 0.079   |

**Table S6. Clinical characteristics of expanded and not expanded samples at first time point post DLI.**

Shown is the absolute number (%) for categorical variables and the median absolute value (range) for numerical variables. Fisher's exact test (two-tailed) was used for comparison of categorical variables; numerical variables were analyzed with unpaired Student t-test (normally distributed data) or two-tailed Mann-Whitney test (not normally distributed data). Abbreviations: aGVHD, acute graft-versus-host disease; alloHSCT, allogeneic hematopoietic stem cell transplantation; AML, acute myeloid leukemia; c/oGVHD, chronic/overlap graft-versus-host disease; BW, body weight; DLI, donor lymphocyte infusion; NRM, non-relapse mortality; OS, overall survival; RIC, reduced intensity conditioning. \*Disease risk according to ELN [26] and IPSS-R [27].

**Table S6A: CD4<sup>+</sup>CD25<sup>+</sup>CD127<sup>low</sup> T<sub>reg</sub> cells**

|                                                                   | Expansion                                                     | noExpansion                                                     | P value |
|-------------------------------------------------------------------|---------------------------------------------------------------|-----------------------------------------------------------------|---------|
| N                                                                 | 9                                                             | 12                                                              |         |
| Sex, male                                                         | 4 (44)                                                        | 5 (42)                                                          | >0.999  |
| Age at first DLI, years                                           | 48 (23-63)                                                    | 45.5 (33-72)                                                    | 0.478   |
| Disease details: AML                                              | 5 (56)                                                        | 10 (83)                                                         | 0.331   |
| Disease risk: adverse*                                            | 1 (11)                                                        | 4 (33)                                                          | 0.338   |
| Donor age at alloHSCT, years                                      | 29 (22-45)                                                    | 33 (22-64)                                                      | 0.141   |
| Female donor male recipient                                       | 2 (22)                                                        | 0                                                               | 0.171   |
| Conditioning regimen: RIC                                         | 5 (56)                                                        | 9 (75)                                                          | 0.397   |
| aGVHD post alloHSCT                                               | 2 (22)                                                        | 6 (50)                                                          | 0.367   |
| c/oGVHD post alloHSCT                                             | 2 (22)                                                        | 0                                                               | 0.171   |
| Antineoplastic treatment pre DLI                                  | 4 (44)                                                        | 8 (67)                                                          | 0.396   |
| First DLI, months post alloHSCT                                   | 9.3 (7.9-24.0)                                                | 11.2 (4.6-75.7)                                                 | 0.464   |
| Dose first DLI, CD3 <sup>+</sup> /kg BW                           | 0.5x10 <sup>7</sup> (0.1x10 <sup>7</sup> -1x10 <sup>7</sup> ) | 0.5x10 <sup>7</sup> (0.1x10 <sup>7</sup> -2.5x10 <sup>7</sup> ) | 0.507   |
| Total number of DLI                                               | 2 (1-4)                                                       | 2 (1-7)                                                         | 0.931   |
| Cumulative amount of applied donor cells, CD3 <sup>+</sup> /kg BW | 1x10 <sup>7</sup> (0.5x10 <sup>7</sup> -16x10 <sup>7</sup> )  | 1x10 <sup>7</sup> (0.5x10 <sup>7</sup> -32x10 <sup>7</sup> )    | 0.957   |
| First sampling time point, days post DLI                          | 14 (13-21)                                                    | 14 (12-18)                                                      | 0.123   |
| GVHD at first sampling time point post DLI                        | 0                                                             | 0                                                               | >0.999  |

**Table S6B: CD4<sup>+</sup> T<sub>con</sub> cells**



|                                                                   | Expansion                                                        | noExpansion                                                   | P value |
|-------------------------------------------------------------------|------------------------------------------------------------------|---------------------------------------------------------------|---------|
| N                                                                 | 14                                                               | 7                                                             |         |
| Sex, male                                                         | 6 (43)                                                           | 3 (43)                                                        | >0.999  |
| Age at first DLI, years                                           | 47.5 (23-65)                                                     | 48 (39-72)                                                    | 0.582   |
| Disease details: AML                                              | 10 (71)                                                          | 5 (71)                                                        | >0.999  |
| Disease risk: adverse*                                            | 3 (21)                                                           | 2 (29)                                                        | >0.999  |
| Donor age at alloHSCT, years                                      | 33 (22-64)                                                       | 30 (22-58)                                                    | 0.502   |
| Female donor male recipient                                       | 2 (14)                                                           | 0                                                             | 0.533   |
| Conditioning regimen: RIC                                         | 8 (57)                                                           | 6 (86)                                                        | 0.337   |
| aGVHD post alloHSCT                                               | 6 (43)                                                           | 2 (29)                                                        | 0.656   |
| c/oGVHD post alloHSCT                                             | 1 (9)                                                            | 1 (14)                                                        | >0.999  |
| Antineoplastic treatment pre DLI                                  | 8 (57)                                                           | 4 (57)                                                        | >0.999  |
| First DLI, months post alloHSCT                                   | 10.0 (4.6-23.8)                                                  | 24 (5.6-75.7)                                                 | 0.172   |
| Dose first DLI, CD3 <sup>+</sup> /kg BW                           | 0.75x10 <sup>7</sup> (0.1x10 <sup>7</sup> -2.5x10 <sup>7</sup> ) | 0.5x10 <sup>7</sup> (0.1x10 <sup>7</sup> -1x10 <sup>7</sup> ) | 0.643   |
| Total number of DLI                                               | 2.5 (1-7)                                                        | 2 (1-3)                                                       | 0.355   |
| Cumulative amount of applied donor cells, CD3 <sup>+</sup> /kg BW | 2.2x10 <sup>7</sup> (0.5x10 <sup>7</sup> -32.5x10 <sup>7</sup> ) | 1x10 <sup>7</sup> (0.5x10 <sup>7</sup> -6x10 <sup>7</sup> )   | 0.198   |
| First sampling time point, days post DLI                          | 14 (13-21)                                                       | 14 (12-25)                                                    | 0.988   |
| GVHD at first sampling time point post DLI                        | 0                                                                | 0                                                             | >0.999  |

**Supplementary Table S7. Patient samples.**

All available blood samples are listed for each patient. Abbreviations: DLI, donor lymphocyte infusion; PB, peripheral blood.

| Patient ID | Blood samples (days from first DLI)          | DLI sample |
|------------|----------------------------------------------|------------|
| 01         | 0, 14, 28                                    | yes        |
| 02         | 0, 17, 28                                    | yes        |
| 03         | 0, 13, 27                                    | yes        |
| 07         | 0, 14, 28, 398, 463                          | yes        |
| 08         | 0, 13, 28                                    | yes        |
| 09         | 0, 18, 33                                    | yes        |
| 10         | 0, 13, 27, 274, 372                          | yes        |
| 11         | 0, 14, 28, 264, 292, 344, 455, 476, 483, 497 | yes        |
| 12         | 0, 14, 28, 223, 273, 343                     | yes        |
| 13         | 0, 16, 44, 220, 233, 247, 264                | yes        |
| 16         | 0, 10, 17, 31, 135, 248, 261                 | yes        |
| 17         | 0, 21, 27, 105, 125                          | yes        |
| 18         | 0, 14, 27                                    | no (PB)    |
| 19         | 0, 15, 34, 76                                | yes        |
| 20         | 0, 21, 41, 112, 136, 164, 240                | yes        |
| 22         | -7, 15, 32, 54, 84, 123                      | yes        |
| 23         | 0, 8, 14, 43, 64, 91, 117                    | yes        |
| 25         | -1, 12, 24, 54, 96, 124                      | yes        |
| 27         | 0, 13, 33, 77, 99, 126, 191                  | no (PB)    |
| 30         | 0, 14, 28, 61, 97                            | yes        |
| 33         | 0, 13, 31, 56, 97, 110                       | yes        |

**Supplementary Table S8. Healthy control samples.**

All available blood samples meeting inclusion criteria are listed for each healthy control.

Abbreviations: HC, healthy control.

| HC ID  | Blood samples (days from study entry) |
|--------|---------------------------------------|
| H16.02 | 0, 14, 33, 187                        |
| H16.03 | 0, 14, 33, 64, 124, 187               |
| H16.04 | 0, 14, 124, 187                       |
| H16.06 | 0, 33, 68, 141, 188                   |
| H16.07 | 0, 14, 33, 62, 91, 124, 187           |
| H16.11 | 0, 14, 30, 65, 93, 119, 183           |
| H16.12 | 0, 30, 93, 177                        |
| H16.13 | 0, 16, 63, 120                        |
| H16.14 | 0, 13, 28, 63, 90, 121, 208           |

**Supplementary Table S9. Antibody panel for flow cytometry.**

|   | Specificity | Fluorochrome | RRID        | Clone     | Order number | Company         | Dilution |
|---|-------------|--------------|-------------|-----------|--------------|-----------------|----------|
| 1 | CD45        | APC-Vio770   | AB_2660424  | 5B1       | 130-096-609  | Miltenyi Biotec | 1:100    |
| 2 | TCRgd       | PE           | AB_2868642  | 11F2      | 333141       | BD              | 1:50     |
| 3 | TCRab       | FITC         | AB_2661263  | BW242/412 | 130-098-688  | Miltenyi Biotec | 1:50     |
| 4 | CD4         | PerCP        | AB_2660475  | M-T466    | 130-101-147  | Miltenyi Biotec | 1:50     |
| 5 | CD8         | VioGreen     | AB_2660905  | 135/80    | 130-096-902  | Miltenyi Biotec | 1:50     |
| 6 | CD25        | BV605        | AB_244320   | 4E3       | 130-091-024  | Miltenyi Biotec | 1:50     |
| 7 | CD127       | APC          | AB_10829303 | MB15-18C9 | 130-094-890  | Miltenyi Biotec | 1:50     |
| 8 | Viability   | DAPI         | n/a         | n/a       | 130-111-570  | Miltenyi Biotec | 1:200    |
